# Supplementary material
Source: PubMed Central journal article supplement (PMC6150474)
Supplement: NIHMS1504816-supplement-Supp1.pdf [file NIHMS1504816-supplement-Supp1.pdf]

# Appendix: Proof of direction of Neyman's bias and counterexamples

D.M. Swanson<sup>1,3</sup>, C.D. Anderson<sup>2</sup>, and R.A. Betensky<sup>3</sup>

<sup>1</sup>Oslo Centre for Biostatistics and Epidemiology, Oslo University Hospital, Oslo, NO 0407,

<sup>2</sup>Department of Neurology, Massachusetts General Hospital, 55 Fruit St, Boston, Massachusetts, 02114,

<sup>3</sup>Harvard School of Public Health, 655 Huntington Ave, Boston, Massachusetts, 02115.

In this supplementary material, we provide a theorem regarding the direction of Neyman's bias under certain modeling assumptions and examples of when Neyman's bias does or does not occur.

**Theorem 1** *If  $G$  is associated with  $D$  such that  $OR(t^*) \neq 1$ , the distribution of  $D \mid (G = 0)$  and  $D \mid (G = 1)$  belong to the same location family,  $pr(X > 0) = 1$ ,  $pr(X < t^{**}) > 0$  (where  $t^{**}$  is defined as the time between  $t^*$  and the first possible presence of disease among the exposed or unexposed), and  $X \perp\!\!\!\perp (D \mid G)^T$ , then  $OR_{ob}(t^*) \neq OR_{tr}(t^*)$ . Specifically, if  $D \mid (G = 0)$  is stochastically greater than  $D \mid (G = 1)$  (alternatively, stochastically less than) so that exposure is a risk factor for disease (alternatively, protective against disease), then  $OR_{ob}(t^*) < OR_{tr}(t^*)$  (alternatively,  $OR_{ob}(t^*) > OR_{tr}(t^*)$ ).*

**Proof** Define  $\partial F_{D \mid G=0}(x)/\partial x = f_0(x)$  and  $\partial F_{D \mid G=1}(x)/\partial x = f_1(x)$ , and suppose that  $f_1(x) = f_0(x - k)$  for some  $k$  positive, without loss of generality. Such a scenario corresponds to exposure being protective against disease, though below we will also consider it a risk factor.  $f_1(x)$  and  $f_0(x)$  are in the same location family. Define  $F(x)$  as the cumulative distribution function of  $X$  evaluated at  $x$  and remember  $F(0) = 0$  and  $F(t^*) > 0$ . Consider the two quantities:

$$\frac{\int_0^{t^*} \{1 - F(t^* - x)\} f_0(x) \partial x}{\int_0^{t^*} f_0(x) \partial x} \quad \text{and} \quad \frac{\int_0^{t^*} \{1 - F(t^* - x)\} f_1(x) \partial x}{\int_0^{t^*} f_1(x) \partial x},$$

which we call the “percent erosion” of  $\int_0^{t^*} f_0(x) \partial x$  and  $\int_0^{t^*} f_1(x) \partial x$ , respectively. Then

$$\begin{aligned} \frac{\int_0^{t^*} \{1 - F(t^* - x)\} f_1(x) \partial x}{\int_0^{t^*} f_1(x) \partial x} &= \frac{\int_0^{t^*} \{1 - F(t^* - x)\} f_0(x - k) \partial x}{\int_0^{t^*} f_0(x - k) \partial x} \\ &= \frac{\int_{-k}^{(t^*-k)} [1 - F\{t^* - (x + k)\}] f_0(x) \partial x}{\int_{-k}^{(t^*-k)} f_0(x) \partial x}. \end{aligned}$$

Since  $F(\cdot)$  a cumulative distribution function and therefore increasing, we have

$$\begin{aligned} \frac{\int_0^{t^*} \{1 - F(t^* - x)\} f_1(x) \partial x}{\int_0^{t^*} f_1(x) \partial x} &= \frac{\int_{-k}^{(t^*-k)} [1 - F\{t^* - (x + k)\}] f_0(x) \partial x}{\int_{-k}^{(t^*-k)} f_0(x) \partial x} \\ &> \frac{\int_0^{t^*} \{1 - F(t^* - x)\} f_0(x) \partial x}{\int_0^{t^*} f_0(x) \partial x}, \quad (1) \end{aligned}$$

because at every “successive”  $\partial x$  in each integral,  $1 - F\{t^* - (x + k)\} \geq 1 - F(t^* - x)$  and there is some  $0 < x < t^*$  for which  $1 - F\{t^* - (x + k)\} > 1 - F(t^* - x)$ . Thus, the “percent erosion” of  $f_0(x)$  will always be greater than that of  $f_1(x) = f_0(x - k)$ , which is intuitive since  $f_1(\cdot)$  is located to the right of  $f_0(\cdot)$  and thus subject to the corrosive

effects of  $F(\cdot)$  for less “time.” Then using the inequality in (1),

$$\begin{aligned} 1 &> \left[ \frac{\int_0^{t^*} (1 - F(t^* - x)) f_0(x) \partial x}{\int_0^{t^*} f_0(x) \partial x} \right] / \left[ \frac{\int_0^{t^*} (1 - F(t^* - x)) f_1(x) \partial x}{\int_0^{t^*} f_1(x) \partial x} \right] \\ &= \frac{\int_0^{t^*} f_1(x) \partial x p}{\int_0^{t^*} f_0(x) \partial x (1 - p)} \times \frac{\int_0^{t^*} \{1 - F(t^* - x)\} f_0(x) \partial x (1 - p)}{\int_0^{t^*} \{1 - F(t^* - x)\} f_1(x) \partial x p} \\ &= \frac{pr(\text{Case, Exposed})}{pr(\text{Case, Unexposed})} \times \frac{pr(\text{Case, Unexposed, Observed})}{pr(\text{Case, Exposed, Observed})}, \end{aligned}$$

which implies that

$$\frac{pr(\text{Case, Exposed, Observed})}{pr(\text{Case, Unexposed, Observed})} > \frac{pr(\text{Case, Exposed})}{pr(\text{Case, Unexposed})} \quad \text{and} \quad OR_{ob}(t^*) > OR_{tr}(t^*)$$

since  $pr(X > 0)$  implies  $pr(\text{Control, Exposed, Observed}) = pr(\text{Control, Exposed})$  and  $pr(\text{Control, Unexposed, Observed}) = pr(\text{Control, Unexposed})$ . Again, these inequalities only hold when exposure is protective against disease. When exposure is a risk factor for disease and therefore shifts the mean age of disease onset to the left under the above assumptions,

$$\frac{pr(\text{Case, Exposed, Observed})}{pr(\text{Case, Unexposed, Observed})} < \frac{pr(\text{Case, Exposed})}{pr(\text{Case, Unexposed})} \quad \text{and} \quad OR_{ob}(t^*) < OR_{tr}(t^*)$$

using analogous results. So we see that the bias is not toward the null, but in a definite direction depending on model assumptions.

**Example 1** Consider  $D \mid (G = 1)$  uniform on  $(0, 2)$ ,  $D \mid (G = 0)$  uniform on  $(0, 1)$ , and  $X$  uniform on  $(0, 3)$ , independent of  $G$ . Clearly the distributions of disease for exposed and unexposed are not in the same location family in this case, and the model for  $X$  corresponds to disease-induced mortality necessarily occurring within 3 times units after disease,  $D$ . We need only consider cases when investigating the odds ratio since we assume  $pr(X > 0) = 1$ , implying  $pr(D < M_d) = 1$ . Taking  $t^* = 1$ ,

$$\begin{aligned} \frac{pr(\text{Case, Exposed, Observed})}{pr(\text{Case, Unexposed, Observed})} &= \frac{\int_0^1 (2/3 + x/3) (1/2) p \partial x}{\int_0^1 (2/3 + x/3) 1 (1 - p) \partial x} \\ &= \frac{1/2 \int_0^1 (2/3 + x/3) p \partial x}{1 \int_0^1 (2/3 + x/3) (1 - p) \partial x} = \frac{1 p}{2 (1 - p)} = \frac{pr(\text{Case, Exposed})}{pr(\text{Case, Unexposed})}. \end{aligned}$$

So we have  $X$  independent of exposure status and time of disease-onset, as was the case above, but here  $OR_{ob} = OR_{tr}$ .

**Example 2** Consider again  $D \mid (G = 1)$  uniform on  $(0, 2)$ , and  $D \mid (G = 0)$  uniform on  $(0, 1)$ . However, consider  $X \mid (G = 1)$  uniform on  $(0, 3)$  and  $X \mid (G = 0)$  with density  $f_{X|G=0}(x) = 2/3 (1 - x)^2$  on  $[0, 1 + (9/2)^{1/3}]$ . Again, we need only consider cases when investigating potential bias of the odds ratio since we assume  $pr(D < M_d) = 1$  so that controls are not subject to the bias-inducing mortality event. Taking  $t^* = 1$ ,

$$\begin{aligned} \frac{pr(\text{Case, Exposed, Observed})}{pr(\text{Case, Unexposed, Observed})} &= \frac{\int_0^1 (2/3 + x/3) (1/2) p \partial x}{\int_0^1 (7/9 + 2x^3/9) 1 (1 - p) \partial x} \\ &= \frac{1/2 \cdot \int_0^1 (2/3 + x/3) p \partial x}{1 \int_0^1 (7/9 + 2x^3/9) (1 - p) \partial x} = \frac{1/2 (5/6) p}{1 (5/6) (1 - p)} = \frac{1 p}{2 (1 - p)} = \frac{pr(\text{Case, Exposed})}{pr(\text{Case, Unexposed})}, \end{aligned}$$

and so here we have no bias again.

**Example 3** Assume the same models of  $D$  conditional on  $G$ , and suppose  $X \mid (G = 1)$  is uniform on  $(0, 3)$  and  $X \mid (G = 0)$  has density  $f_{X|G=0}(x) = 5/2 (1 - x)^4$  on  $[0, 1 + 2^{1/5}]$ . For the reasons given above, we again only consider cases for investigating the bias of the odds ratio. Taking  $t^* = 1$ ,

$$\begin{aligned} \frac{pr(\text{Case, Exposed, Observed})}{pr(\text{Case, Unexposed, Observed})} &= \frac{\int_0^1 (2/3 + x/3) (1/2) p \partial x}{\int_0^1 (1/2 + x^5/2) 1 (1 - p) \partial x} \\ &= \frac{1/2 \int_0^1 (2/3 + x/3) p \partial x}{1 \int_0^1 (1/2 + x^5/2) (1 - p) \partial x} = \frac{1/2 (5/6) p}{1 (7/12) (1 - p)} \neq \frac{1 p}{2 (1 - p)} = \frac{pr(\text{Case, Exposed})}{pr(\text{Case, Unexposed})}, \end{aligned}$$

and so here we have bias.

**Example 4** Take  $D \mid (G = 1)$  with density  $f_{D|G=1}(x) = x^2/4$  on  $[0, 12^{1/3}]$ ,  $D \mid (G = 0)$  with density  $f_{D|G=0}(x) = x/3$   $[0, 6^{1/2}]$ . Then let  $X \mid (G = 1)$  have density  $f_{X|G=1}(x) = (2-x)^2/4$  on  $[0, 2+4^{1/3}]$  and  $X \mid (G = 0)$  be uniform on  $[0, 2]$ . As before, we need only consider cases when investigating the odds ratio since we assume  $pr(D < M_d) = 1$  so that controls are not subject to the bias-inducing mortality event. Taking  $t^* = 2$ ,

$$\begin{aligned} \frac{pr(\text{Case, Exposed, Observed})}{pr(\text{Case, Unexposed, Observed})} &= \frac{\int_0^2 (1/3 + 1/12 x^3) (x^2/4) p \partial x}{\int_0^2 (x/2) x/3 (1-p) \partial x} \\ &= \frac{(4/9) p}{4/9 (1-p)} = \frac{p \int_0^2 (x^2/4) \partial x}{(1-p) \int_0^2 x/3 \partial x} = \frac{p}{1-p} = \frac{pr(\text{Case, Exposed})}{pr(\text{Case, Unexposed})}. \end{aligned}$$

Remember that  $pr(\text{Case, Exposed})/pr(\text{Case, Unexposed}) = p/(1-p)$  implies  $OR_{tr}(t^*) = 1$  when  $pr(D < M_d) = 1$ , which is assumed from condition 3.

**Example 5** On the other hand, we can obtain a biased odds ratio using the same conditional disease models as in the previous example and having  $X \mid (G = 1)$  with density  $f_{X|G=1}(x) = (2-x)^2/4$  on  $[0, 2+4^{1/3}]$  and  $X \mid (G = 0)$  uniform on  $[0, 2]$ . We again assume  $pr(D < M_d) = 1$  from condition 3. Taking  $t^* = 2$ ,

$$\begin{aligned} \frac{pr(\text{Case, Exposed, Observed})}{pr(\text{Case, Unexposed, Observed})} &= \frac{\int_0^2 (1/2 + 1/16 x^3) (x^2/4) p \partial x}{\int_0^2 (x/2) x/3 (1-p) \partial x} = \frac{p(1/2)}{(1-p)4/9} \\ &\neq \frac{(4/9) p}{4/9 (1-p)} = \frac{p \int_0^2 (x^2/4) \partial x}{(1-p) \int_0^2 x/3 \partial x} = \frac{p}{1-p} = \frac{pr(\text{Case, Exposed})}{pr(\text{Case, Unexposed})}. \end{aligned}$$
